# Supplementary material
Source: MDPI journal article supplement (https://www.mdpi.com/2072-4292/15/10/2494)
Supplement: s1 [file s1 › remotesensing-2266367-supplementary.pdf]

## Supplementary Material

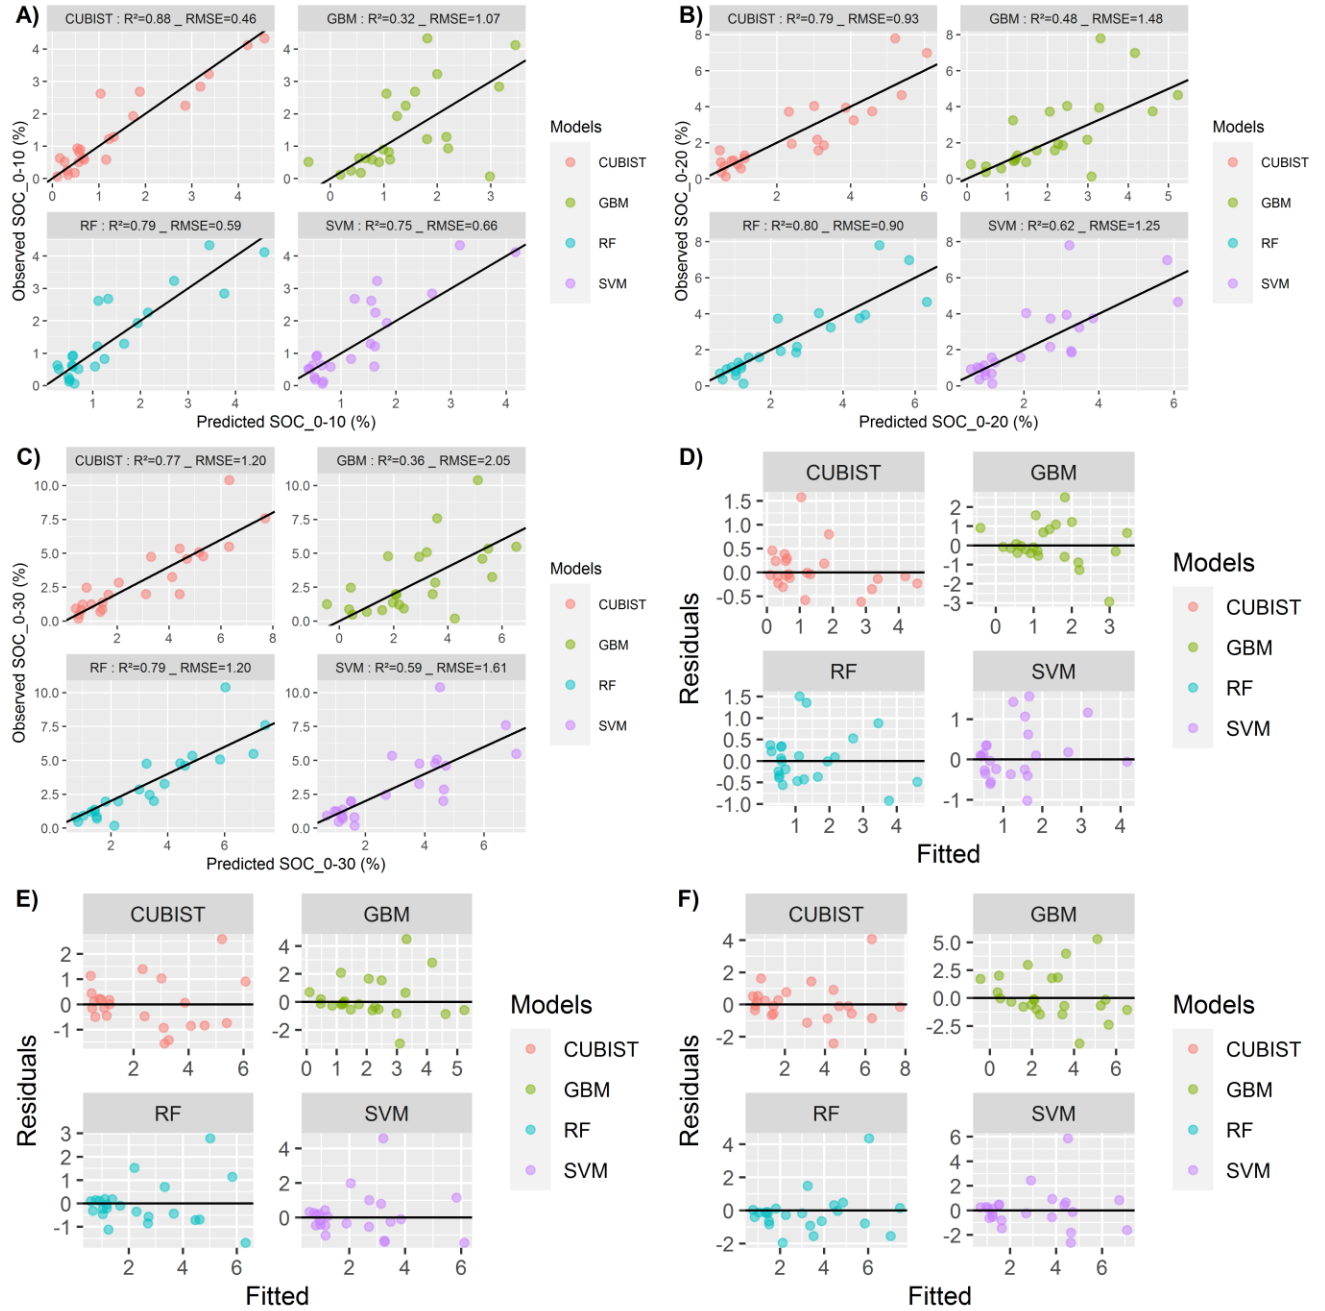

**Figure S1.** Distribution of measured versus predicted SOC: A) 0-10 cm depth, B) 0-20 cm depth, C) 0-30 cm depth; Distribution of residuals versus fit for D) 0-10 cm depth, E) 0-20 cm depth, F) 0-30 cm depth.

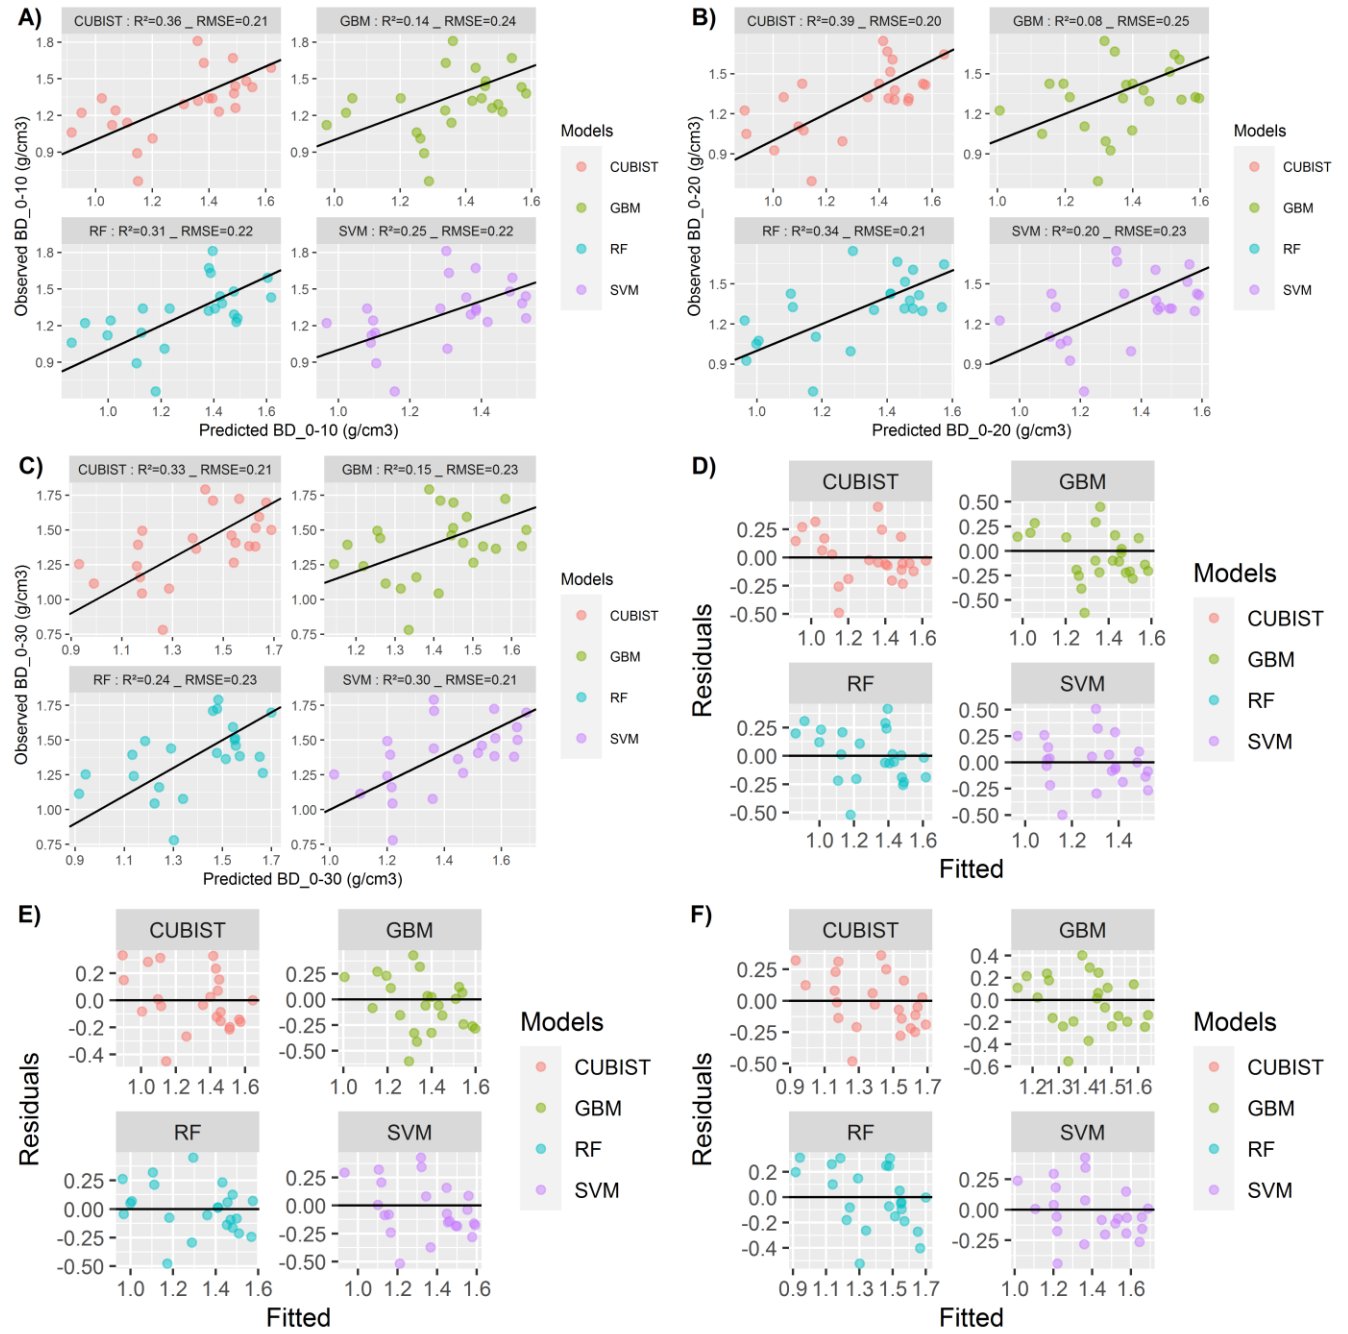

**Figure S2.** Distribution of measured versus predicted BDs: A) 0-10 cm depth, B) 0-20 cm depth, C) 0-30 cm depth; Distribution of residuals versus fit for D) 0-10 cm depth, E) 0-20 cm depth, F) 0-30 cm depth.

**Table S1.** Best tuning hyperparameters of the models

|           | Models | Hyperparameters                                                                |
|-----------|--------|--------------------------------------------------------------------------------|
| SOCS_0-10 | GBM    | n.trees = 150, interaction.depth = 3, shrinkage = 0.1 ,<br>n.minobsinnode = 10 |
|           | Cubist | Committees = 10, neighbors = 0                                                 |
|           | RF     | Mtry = 11                                                                      |
|           | SVM    | sigma = 0.07, C = 1                                                            |
| SOCS_0-20 | GBM    | n.trees = 150, interaction.depth = 3, shrinkage = 0.1 ,<br>n.minobsinnode = 10 |
|           | Cubist | Committees = 20, neighbors = 0                                                 |
|           | RF     | Mtry = 5                                                                       |
|           | SVM    | sigma = 0.07, C = 1                                                            |
| SOCS_0-30 | GBM    | n.trees = 150, interaction.depth = 3, shrinkage = 0.1 ,<br>n.minobsinnode = 10 |
|           | Cubist | Committees 10, neighbors = 5                                                   |
|           | RF     | Mtry = 8                                                                       |
|           | SVM    | sigma = 0.05 , C = 1                                                           |
| SOC_0-10  | GBM    | n.trees = 150, interaction.depth = 3, shrinkage = 0.1 ,<br>n.minobsinnode = 10 |
|           | Cubist | Committees = 20, neighbors = 0                                                 |
|           | RF     | Mtry = 9                                                                       |
|           | SVM    | sigma = 0.07, C 1                                                              |
| SOC_0-20  | GBM    | n.trees = 150, interaction.depth = 3, shrinkage = 0.1 ,<br>n.minobsinnode = 10 |
|           | Cubist | Committees = 20, neighbors = 0                                                 |
|           | RF     | Mtry = 3                                                                       |
|           | SVM    | sigma = 0.07, C = 1                                                            |
| SOC_0-30  | GBM    | n.trees = 150, interaction.depth = 3, shrinkage = 0.1 ,<br>n.minobsinnode = 10 |
|           | Cubist | Committees = 20, neighbors = 0                                                 |
|           | RF     | Mtry = 2                                                                       |

|           |        |                     |
|-----------|--------|---------------------|
|           | SVM    | sigma = 0.07, C = 1 |
| SOCS_0-30 | rf_b   | mtry = 2            |
|           | rf_brs | mtry = 4            |
|           | rf_bs  | mtry = 3            |
|           | rf_bt  | mtry = 4            |
|           | rf_rs  | mtry = 2            |
|           | rf_rst | mtry = 4            |
|           | rf_s   | mtry = 3            |
|           | rf_srs | mtry = 3            |
|           | rf_st  | mtry = 3            |
|           | rf_t   | mtry = 2            |
